# Supplementary material
Source: publisher figshare collection journal article supplement (https://acs.figshare.com/ndownloader/files/10689664)
Supplement: Supplementary file 1 [file 10689664]

#======================================================================

# CRYSTAL DATA

#----------------------------------------------------------------------

data_VESTA_phase_1


_chemical_name_common                  'Pentacene_3L_newly_optimized'
_cell_length_a                         6.07000
_cell_length_b                         7.82000
_cell_length_c                         43.14900
_cell_angle_alpha                      90
_cell_angle_beta                       90
_cell_angle_gamma                      84.50000
_space_group_name_H-M_alt              'P 1'
_space_group_IT_number                 1

loop_
_space_group_symop_operation_xyz
   'x, y, z'

loop_
   _atom_site_label
   _atom_site_occupancy
   _atom_site_fract_x
   _atom_site_fract_y
   _atom_site_fract_z
   _atom_site_adp_type
   _atom_site_B_iso_or_equiv
   _atom_site_type_symbol
C1	1.000	0.215923	0.915035	-0.330825	Biso	4.9	C
C2	1.000	0.783897	0.084728	-0.335096	Biso	4.9	C
C3	1.000	0.155199	0.010088	-0.357577	Biso	4.9	C
C4	1.000	0.932166	0.097281	-0.359757	Biso	4.9	C
C5	1.000	0.303373	0.023305	-0.382546	Biso	4.9	C
C6	1.000	0.870728	0.191425	-0.386814	Biso	4.9	C
C7	1.000	0.240602	0.116792	-0.409114	Biso	4.9	C
C8	1.000	0.017696	0.202777	-0.411313	Biso	4.9	C
C9	1.000	0.388308	0.130294	-0.434658	Biso	4.9	C
C10	1.000	0.954446	0.295900	-0.438925	Biso	4.9	C
C11	1.000	0.320680	0.222558	-0.460512	Biso	4.9	C
C12	1.000	0.101401	0.306023	-0.462760	Biso	4.9	C
C13	1.000	0.844602	0.989726	-0.308350	Biso	4.9	C
C14	1.000	0.067582	0.902439	-0.306148	Biso	4.9	C
C15	1.000	0.696126	0.976858	-0.283415	Biso	4.9	C
C16	1.000	0.128462	0.808370	-0.279040	Biso	4.9	C
C17	1.000	0.758502	0.883990	-0.256768	Biso	4.9	C
C18	1.000	0.981248	0.797745	-0.254513	Biso	4.9	C
C19	1.000	0.610809	0.872582	-0.231141	Biso	4.9	C
C20	1.000	0.043664	0.705658	-0.226743	Biso	4.9	C
C21	1.000	0.678148	0.783099	-0.204955	Biso	4.9	C
C22	1.000	0.897047	0.698522	-0.202743	Biso	4.9	C
C23	1.000	0.689256	0.564269	-0.319584	Biso	4.9	C
C24	1.000	0.311335	0.435561	-0.346022	Biso	4.9	C
C25	1.000	0.545146	0.482301	-0.300440	Biso	4.9	C
C26	1.000	0.349824	0.416497	-0.314056	Biso	4.9	C
C27	1.000	0.583016	0.463089	-0.268263	Biso	4.9	C
C28	1.000	0.204359	0.335445	-0.294578	Biso	4.9	C
C29	1.000	0.438530	0.382433	-0.249347	Biso	4.9	C
C30	1.000	0.243147	0.317575	-0.262858	Biso	4.9	C
C31	1.000	0.473188	0.364362	-0.216629	Biso	4.9	C
C32	1.000	0.094922	0.237517	-0.242937	Biso	4.9	C
C33	1.000	0.325589	0.288163	-0.198370	Biso	4.9	C
C34	1.000	0.134569	0.223282	-0.211708	Biso	4.9	C
C35	1.000	0.455521	0.517723	-0.365177	Biso	4.9	C
C36	1.000	0.650739	0.583333	-0.351499	Biso	4.9	C
C37	1.000	0.418902	0.537546	-0.397390	Biso	4.9	C
C38	1.000	0.797027	0.664588	-0.370755	Biso	4.9	C
C39	1.000	0.564570	0.618471	-0.416101	Biso	4.9	C
C40	1.000	0.759471	0.683121	-0.402429	Biso	4.9	C
C41	1.000	0.533006	0.636376	-0.448847	Biso	4.9	C
C42	1.000	0.909207	0.763802	-0.421974	Biso	4.9	C
C43	1.000	0.682905	0.712361	-0.466729	Biso	4.9	C
C44	1.000	0.871983	0.778232	-0.453193	Biso	4.9	C
C45	0.674	0.727922	0.116103	0.001562	Biso	4.5	C
C46	0.674	0.296127	0.286255	-0.002723	Biso	4.5	C
C47	0.674	0.666903	0.210331	-0.025285	Biso	4.5	C
C48	0.674	0.443899	0.297690	-0.027502	Biso	4.5	C
C49	0.674	0.814496	0.222011	-0.050387	Biso	4.5	C
C50	0.674	0.382366	0.390805	-0.054692	Biso	4.5	C
C51	0.674	0.751376	0.313728	-0.077148	Biso	4.5	C
C52	0.674	0.528826	0.400369	-0.079342	Biso	4.5	C
C53	0.674	0.897952	0.323892	-0.102950	Biso	4.5	C
C54	0.674	0.465921	0.492219	-0.107119	Biso	4.5	C
C55	0.674	0.830165	0.413152	-0.129149	Biso	4.5	C
C56	0.674	0.611750	0.498661	-0.131231	Biso	4.5	C
C57	0.674	0.356909	0.191630	0.024085	Biso	4.5	C
C58	0.674	0.579648	0.103690	0.026262	Biso	4.5	C
C59	0.674	0.208964	0.179878	0.049127	Biso	4.5	C
C60	0.674	0.639968	0.008635	0.053282	Biso	4.5	C
C61	0.674	0.270854	0.086247	0.075716	Biso	4.5	C
C62	0.674	0.492567	0.997801	0.077797	Biso	4.5	C
C63	0.674	0.123614	0.075713	0.101422	Biso	4.5	C
C64	0.674	0.553373	0.902724	0.105301	Biso	4.5	C
C65	0.674	0.189416	0.983278	0.127346	Biso	4.5	C
C66	0.674	0.406502	0.895247	0.129262	Biso	4.5	C
C67	0.674	0.202607	0.754310	0.012118	Biso	4.5	C
C68	0.674	0.819120	0.633365	-0.014073	Biso	4.5	C
C69	0.674	0.056533	0.674706	0.031375	Biso	4.5	C
C70	0.674	0.858636	0.612434	0.017850	Biso	4.5	C
C71	0.674	0.094435	0.654519	0.063565	Biso	4.5	C
C72	0.674	0.712194	0.532388	0.037342	Biso	4.5	C
C73	0.674	0.947955	0.576114	0.082546	Biso	4.5	C
C74	0.674	0.751378	0.513121	0.069037	Biso	4.5	C
C75	0.674	0.981523	0.558347	0.115309	Biso	4.5	C
C76	0.674	0.602526	0.433402	0.088911	Biso	4.5	C
C77	0.674	0.832447	0.483509	0.133545	Biso	4.5	C
C78	0.674	0.641452	0.419000	0.120144	Biso	4.5	C
C79	0.674	0.964628	0.713781	-0.033304	Biso	4.5	C
C80	0.674	0.162690	0.775800	-0.019765	Biso	4.5	C
C81	0.674	0.926620	0.735004	-0.065491	Biso	4.5	C
C82	0.674	0.308994	0.856618	-0.039162	Biso	4.5	C
C83	0.674	0.072504	0.814768	-0.084361	Biso	4.5	C
C84	0.674	0.268898	0.877842	-0.070790	Biso	4.5	C
C85	0.674	0.038855	0.833558	-0.117110	Biso	4.5	C
C86	0.674	0.416626	0.959672	-0.090524	Biso	4.5	C
C87	0.674	0.187480	0.909452	-0.135249	Biso	4.5	C
C88	0.674	0.377579	0.974926	-0.121750	Biso	4.5	C
C89	0.340	0.235902	0.341036	0.336070	Biso	4.7	C
C90	0.340	0.800861	0.504345	0.330995	Biso	4.7	C
C91	0.340	0.173977	0.432154	0.308955	Biso	4.7	C
C92	0.340	0.949610	0.516418	0.306364	Biso	4.7	C
C93	0.340	0.322466	0.443822	0.284006	Biso	4.7	C
C94	0.340	0.888036	0.607784	0.279001	Biso	4.7	C
C95	0.340	0.259447	0.533975	0.257095	Biso	4.7	C
C96	0.340	0.036120	0.618895	0.254599	Biso	4.7	C
C97	0.340	0.407384	0.544397	0.231488	Biso	4.7	C
C98	0.340	0.974154	0.710887	0.226809	Biso	4.7	C
C99	0.340	0.340646	0.633924	0.205293	Biso	4.7	C
C100	0.340	0.121967	0.718761	0.202966	Biso	4.7	C
C101	0.340	0.862708	0.413076	0.358110	Biso	4.7	C
C102	0.340	0.087122	0.328824	0.360671	Biso	4.7	C
C103	0.340	0.714570	0.400983	0.383110	Biso	4.7	C
C104	0.340	0.149257	0.237079	0.387948	Biso	4.7	C
C105	0.340	0.777947	0.309902	0.409918	Biso	4.7	C
C106	0.340	0.001448	0.225048	0.412318	Biso	4.7	C
C107	0.340	0.630027	0.297069	0.435450	Biso	4.7	C
C108	0.340	0.064132	0.131426	0.439893	Biso	4.7	C
C109	0.340	0.696958	0.204284	0.461270	Biso	4.7	C
C110	0.340	0.915984	0.120329	0.463578	Biso	4.7	C
C111	0.340	0.707761	0.983787	0.346191	Biso	4.7	C
C112	0.340	0.331537	0.853756	0.319516	Biso	4.7	C
C113	0.340	0.565167	0.899063	0.365190	Biso	4.7	C
C114	0.340	0.370460	0.833119	0.351416	Biso	4.7	C
C115	0.340	0.602463	0.877666	0.397357	Biso	4.7	C
C116	0.340	0.224918	0.750559	0.370599	Biso	4.7	C
C117	0.340	0.456417	0.796959	0.416043	Biso	4.7	C
C118	0.340	0.261813	0.732191	0.402304	Biso	4.7	C
C119	0.340	0.487187	0.779648	0.448806	Biso	4.7	C
C120	0.340	0.111649	0.652044	0.421855	Biso	4.7	C
C121	0.340	0.336407	0.704678	0.466701	Biso	4.7	C
C122	0.340	0.147646	0.638667	0.453121	Biso	4.7	C
C123	0.340	0.473988	0.938401	0.300528	Biso	4.7	C
C124	0.340	0.668012	0.005478	0.314290	Biso	4.7	C
C125	0.340	0.435906	0.959085	0.268365	Biso	4.7	C
C126	0.340	0.811229	0.090079	0.295013	Biso	4.7	C
C127	0.340	0.579092	0.042101	0.249602	Biso	4.7	C
C128	0.340	0.772587	0.108902	0.263299	Biso	4.7	C
C129	0.340	0.545137	0.060565	0.216874	Biso	4.7	C
C130	0.340	0.919864	0.190860	0.243526	Biso	4.7	C
C131	0.340	0.692316	0.138065	0.198749	Biso	4.7	C
C132	1.000	0.881724	0.204489	0.212258	Biso	4.7	C
H1	1.000	0.382208	0.849128	-0.329214	Biso	4.9	H
H2	1.000	0.617701	0.150765	-0.336745	Biso	4.9	H
H3	1.000	0.469875	0.957526	-0.381025	Biso	4.9	H
H4	1.000	0.703924	0.256044	-0.388568	Biso	4.9	H
H5	1.000	0.555160	0.065405	-0.433125	Biso	4.9	H
H6	1.000	0.786832	0.358469	-0.440610	Biso	4.9	H
H7	1.000	0.435119	0.233277	-0.479675	Biso	4.9	H
H8	1.000	0.050367	0.377241	-0.483683	Biso	4.9	H
H9	1.000	0.529806	0.042848	-0.285038	Biso	4.9	H
H10	1.000	0.295228	0.743675	-0.277267	Biso	4.9	H
H11	1.000	0.444210	0.937734	-0.232860	Biso	4.9	H
H12	1.000	0.210550	0.641563	-0.225053	Biso	4.9	H
H13	1.000	0.564266	0.776520	-0.185548	Biso	4.9	H
H14	1.000	0.948197	0.627838	-0.181771	Biso	4.9	H
H15	1.000	0.834665	0.614564	-0.309492	Biso	4.9	H
H16	1.000	0.166097	0.385274	-0.356181	Biso	4.9	H
H17	1.000	0.727639	0.514252	-0.258094	Biso	4.9	H
H18	1.000	0.057792	0.286775	-0.304658	Biso	4.9	H
H19	1.000	0.619023	0.414600	-0.206657	Biso	4.9	H
H20	1.000	0.948886	0.189075	-0.253162	Biso	4.9	H
H21	1.000	0.353828	0.276762	-0.173453	Biso	4.9	H
H22	1.000	0.019529	0.162150	-0.196885	Biso	4.9	H
H23	1.000	0.274877	0.486631	-0.407794	Biso	4.9	H
H24	1.000	0.943423	0.712897	-0.360578	Biso	4.9	H
H25	1.000	0.388587	0.585019	-0.459051	Biso	4.9	H
H26	1.000	0.054249	0.812265	-0.411506	Biso	4.9	H
H27	1.000	0.659967	0.722931	-0.491682	Biso	4.9	H
H28	1.000	0.987019	0.840140	-0.467885	Biso	4.9	H
H29	0.674	0.894273	0.050214	0.003228	Biso	4.5	H
H30	0.674	0.130040	0.352515	-0.004345	Biso	4.5	H
H31	0.674	0.980664	0.155654	-0.048837	Biso	4.5	H
H32	0.674	0.215782	0.455904	-0.056434	Biso	4.5	H
H33	0.674	0.064259	0.258027	-0.101373	Biso	4.5	H
H34	0.674	0.299453	0.557146	-0.108686	Biso	4.5	H
H35	0.674	0.943370	0.418914	-0.148656	Biso	4.5	H
H36	0.674	0.560339	0.569540	-0.152176	Biso	4.5	H
H37	0.674	0.043349	0.247226	0.047649	Biso	4.5	H
H38	0.674	0.806056	0.942370	0.054948	Biso	4.5	H
H39	0.674	0.958488	0.143729	0.100011	Biso	4.5	H
H40	0.674	0.718809	0.835853	0.106752	Biso	4.5	H
H41	0.674	0.075298	0.976943	0.146728	Biso	4.5	H
H42	0.674	0.455927	0.821342	0.149945	Biso	4.5	H
H43	0.674	0.350721	0.800718	0.022162	Biso	4.5	H
H44	0.674	0.671440	0.586395	-0.024134	Biso	4.5	H
H45	0.674	0.240995	0.702826	0.073718	Biso	4.5	H
H46	0.674	0.564212	0.485782	0.027308	Biso	4.5	H
H47	0.674	0.127532	0.607772	0.125383	Biso	4.5	H
H48	0.674	0.456455	0.385205	0.078673	Biso	4.5	H
H49	0.674	0.859513	0.472598	0.158493	Biso	4.5	H
H50	0.674	0.525857	0.357868	0.134886	Biso	4.5	H
H51	0.674	0.780485	0.686584	-0.075753	Biso	4.5	H
H52	0.674	0.457214	0.902554	-0.029047	Biso	4.5	H
H53	0.674	0.893128	0.784073	-0.127258	Biso	4.5	H
H54	0.674	0.561615	0.008918	-0.080150	Biso	4.5	H
H55	0.674	0.160663	0.920521	-0.160204	Biso	4.5	H
H56	0.674	0.492222	0.037384	-0.136436	Biso	4.5	H
H57	0.340	0.403357	0.277756	0.338108	Biso	4.7	H
H58	0.340	0.633420	0.567634	0.328983	Biso	4.7	H
H59	0.340	0.489483	0.379386	0.285890	Biso	4.7	H
H60	0.340	0.720411	0.670602	0.276963	Biso	4.7	H
H61	0.340	0.573704	0.478759	0.233218	Biso	4.7	H
H62	0.340	0.807174	0.774946	0.225073	Biso	4.7	H
H63	0.340	0.455420	0.640268	0.185995	Biso	4.7	H
H64	0.340	0.071976	0.790232	0.182047	Biso	4.7	H
H65	0.340	0.547465	0.465382	0.381351	Biso	4.7	H
H66	0.340	0.316907	0.174103	0.389894	Biso	4.7	H
H67	0.340	0.463463	0.362554	0.433921	Biso	4.7	H
H68	0.340	0.231717	0.068502	0.441549	Biso	4.7	H
H69	0.340	0.581925	0.193351	0.480354	Biso	4.7	H
H70	0.340	0.965658	0.047936	0.484420	Biso	4.7	H
H71	0.340	0.852483	0.034367	0.356453	Biso	4.7	H
H72	0.340	0.186835	0.802960	0.309314	Biso	4.7	H
H73	0.340	0.747235	0.927530	0.407772	Biso	4.7	H
H74	0.340	0.078791	0.702105	0.360367	Biso	4.7	H
H75	0.340	0.631867	0.830630	0.459010	Biso	4.7	H
H76	0.340	0.966715	0.603510	0.411397	Biso	4.7	H
H77	0.340	0.358412	0.695030	0.491682	Biso	4.7	H
H78	0.340	0.031960	0.577249	0.467785	Biso	4.7	H
H79	0.340	0.292670	0.906755	0.258030	Biso	4.7	H
H80	0.340	0.956170	0.140444	0.305235	Biso	4.7	H
H81	0.340	0.400233	1.009658	0.206754	Biso	4.7	H
H82	0.340	0.064582	0.240631	0.253861	Biso	4.7	H
H83	0.340	0.665008	0.149524	0.173817	Biso	4.7	H
H84	0.340	0.996895	0.266256	0.197556	Biso	4.7	H
